# Supplementary material for: Molecular mechanisms of acquired resistance to tyrosine kinase targeted therapy
Source: Springer Nature journal article supplement (doi:10.1186/1476-4598-9-75), 2010-04-12

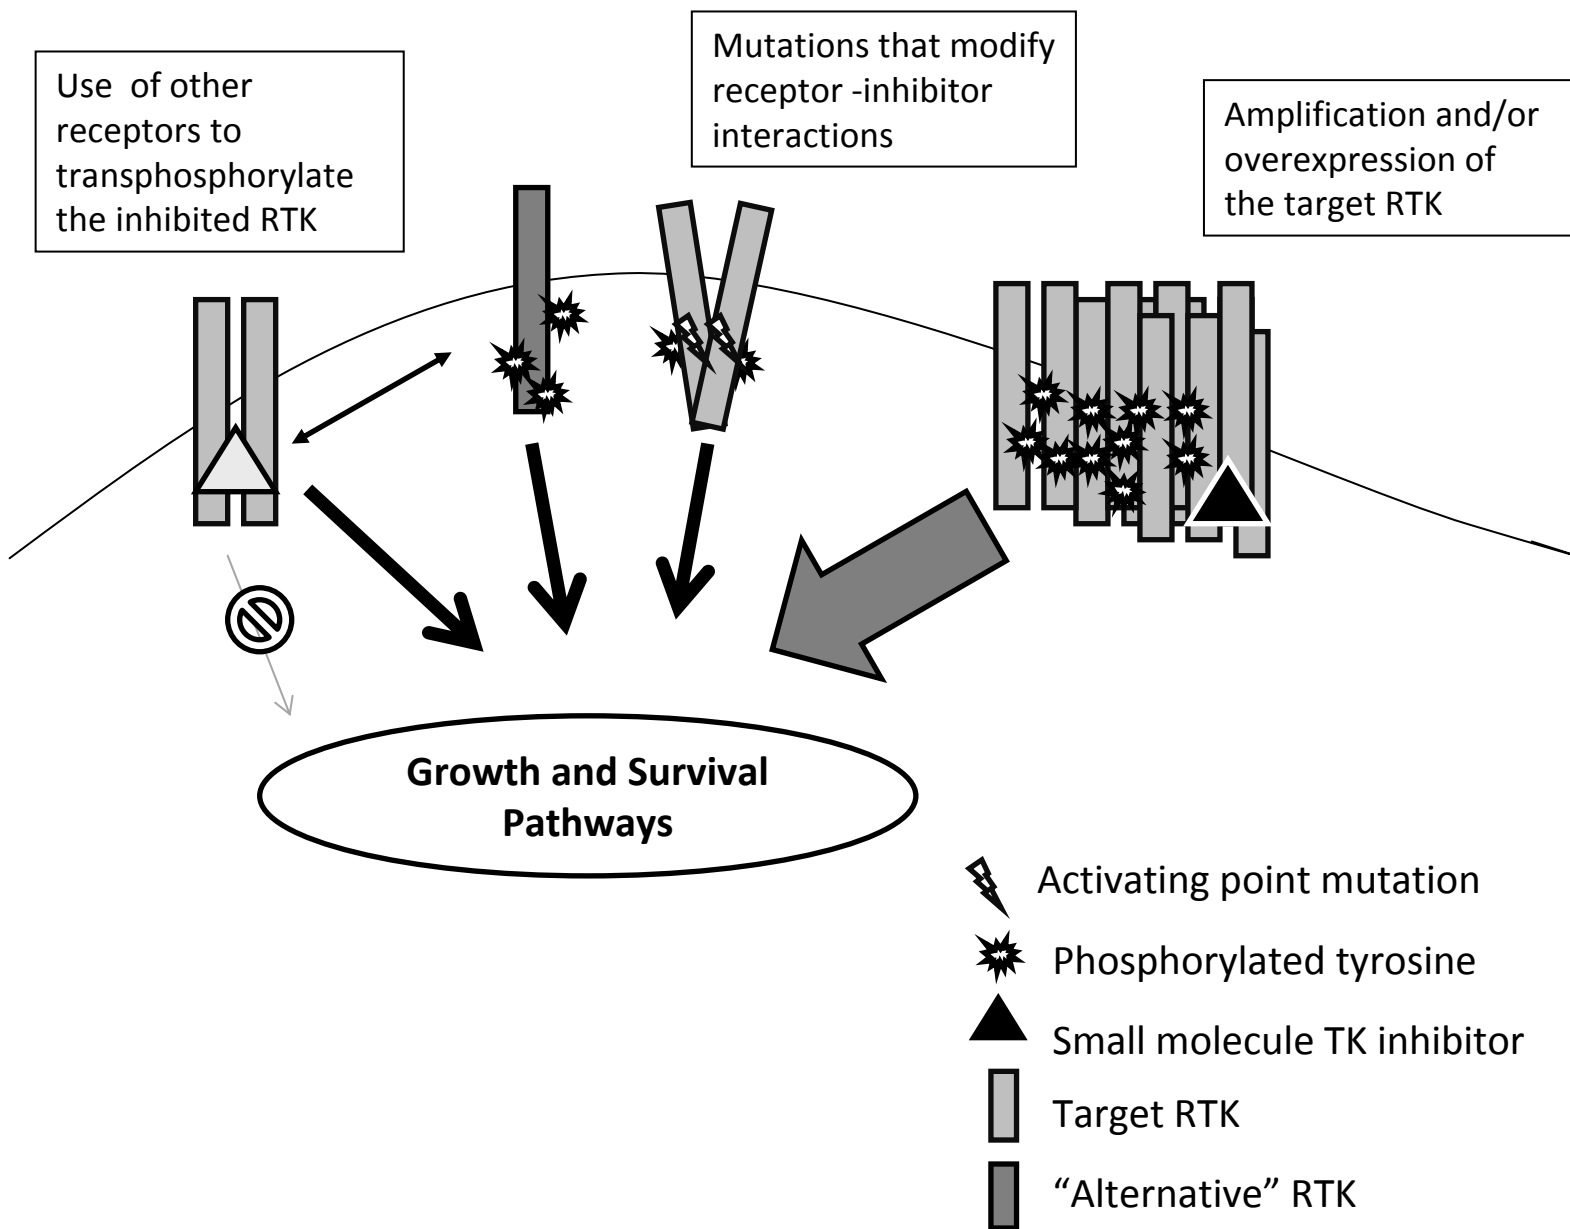

Supplement: 12943_2009_590_MOESM2_ESM.pdf [file 12943_2009_590_MOESM2_ESM.pdf]
